# Supplementary material
Source: MDPI journal article supplement (https://www.mdpi.com/2218-0532/87/2/11)
Supplement: s1 [file s1]

1 *Supplementary*

2 **Development of a derivatization method for**  
3 **investigating testosterone and**  
4 **dehydroepiandrosterone using tandem mass**  
5 **spectrometry in saliva samples from young**  
6 **professional soccer players pre- and post-training**

7 Mansour A Alzahrani <sup>1,\*</sup>, Ghareeb O Alshuwaier <sup>2</sup>, Khalid S Aljaloud <sup>2</sup>, Colin Gibson <sup>3</sup>,  
8 Abedawn Khalaf <sup>3</sup>, Aliyah S Alhawiti <sup>1</sup> and David G. Watson <sup>1,\*</sup>.

9 <sup>1</sup> Strathclyde Institute of Pharmacy and Biomedical Sciences, University of Strathclyde, The John Arbuthnott  
10 Building, 161 Cathedral Street, Glasgow G4 0RE, UK; Aliyah.alhawiti@strath.ac.uk (A.S.A).

11 <sup>2</sup> College of Sport Sciences and Physical Activity, King Saud University, Building 69, Code 11441, P.O. Box  
12 1949, Riyadh KSA; galshuwaier@KSA.EDU.SA (G.O.A) ; Khaljaloud@KSA.EDU.SA (K.S.A).

13 <sup>3</sup> Department of Pure and Applied Chemistry, University of Strathclyde, 295 Cathedral Street, Glasgow G1  
14 1XL

15 ; clgibson@virginmedia.com (C.G); abedawnkhalaf@yahoo.co.uk (A.K).

16 \* Correspondence: mansour.alzahrani@strath.ac.uk (M.A.A) ; D.G.Watson@strath.ac.uk (D.G.W).

17

18 **Supplemental material content:**

19 **Supplementary Figure 1.** Structures of derivatisation 2-Hydrazino-1-methylpyridine derivative  
20 (HMP) with testosterone, dehydroepiandrosterone and epitestosterone.

21 **Supplementary Figure 2.** Optimisation of reaction conditions in derivatisation steroids with  
22 HMP.

23 **Supplementary Figure 3.** Solid phase extraction cartridge selection.

24 **Supplementary Figure 4.** Matrix Effect.

25 **Supplementary Figure 5.** Linearity and calibration of standards spiked into saliva.

26 **Supplementary Figure 6.** Correlation between the concentrations of Sal-DHEA and Sal-T (n=20)  
27 were (A) pre-training and (B) post-training.

28

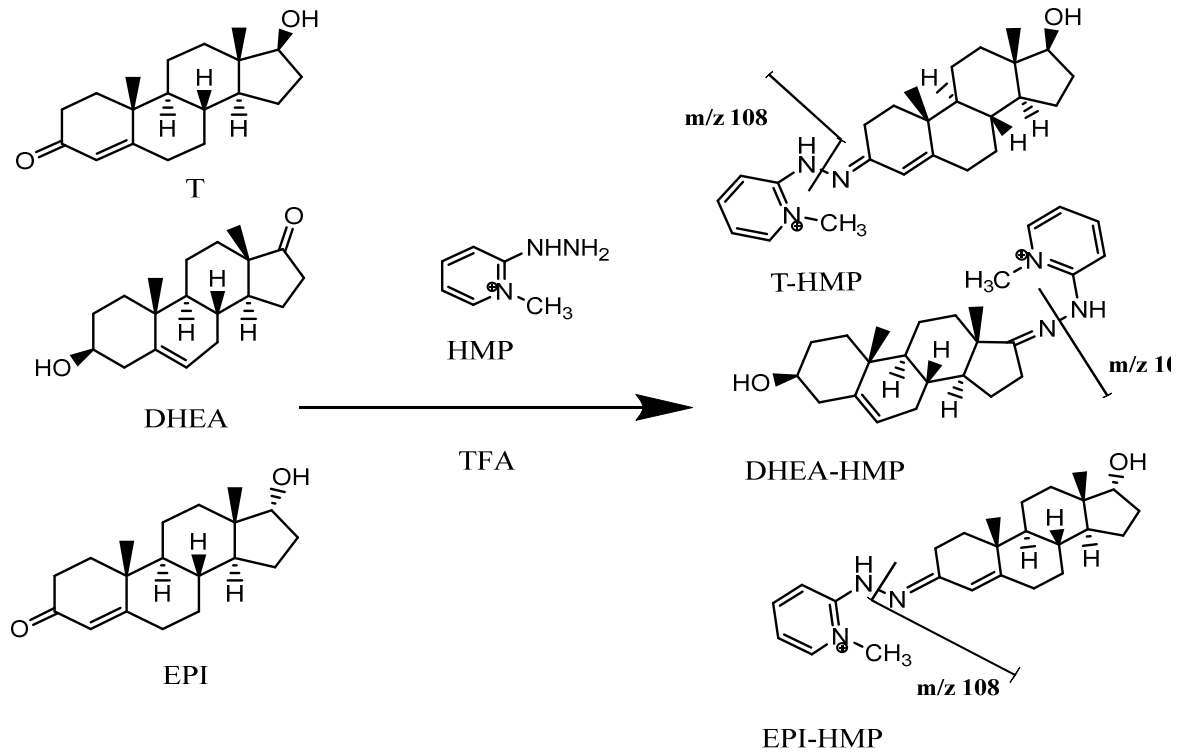

**Fig. S1.** The scheme shows the derivatisation of testosterone (T), dehydroepiandrosterone (DHEA) and epitestosterone (EPI) with 2-hydrazino-1-methylpyridine (HMP) in the presence of Trifluoroacetic acid (TFA).

29

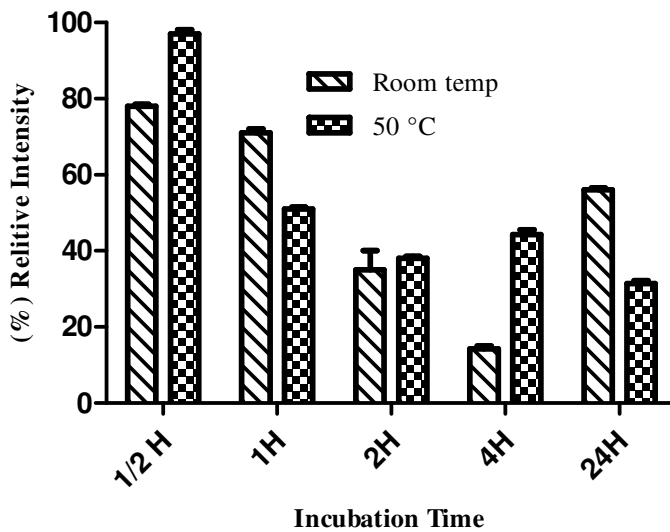

30

31

**Fig S2.** The yield of the HMP derivative of testosterone depending on reaction temperature and time.

32

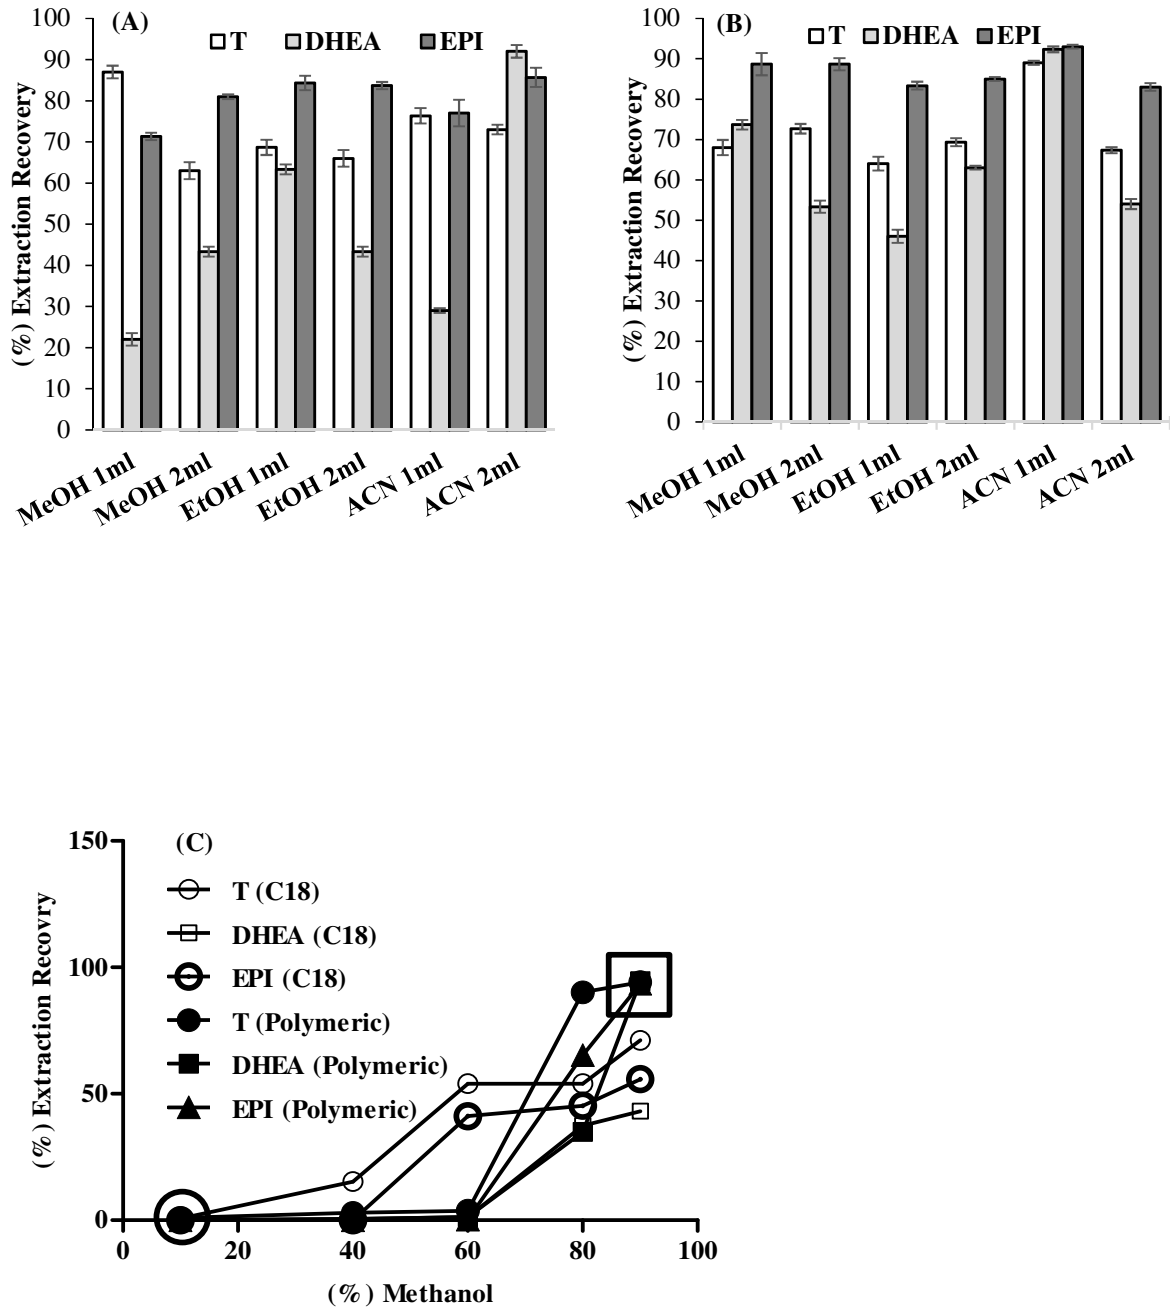

**Fig S3.** Development of an SPE method for androgens using two sorbents of SPE cartridges: (A) effect of elution different solvents and volumes using C18 cartridge; (B) effect of elution with different solvent mixtures and volumes using the polymeric cartridge; (C) effect of different % of methanol in the washing step (n=3).

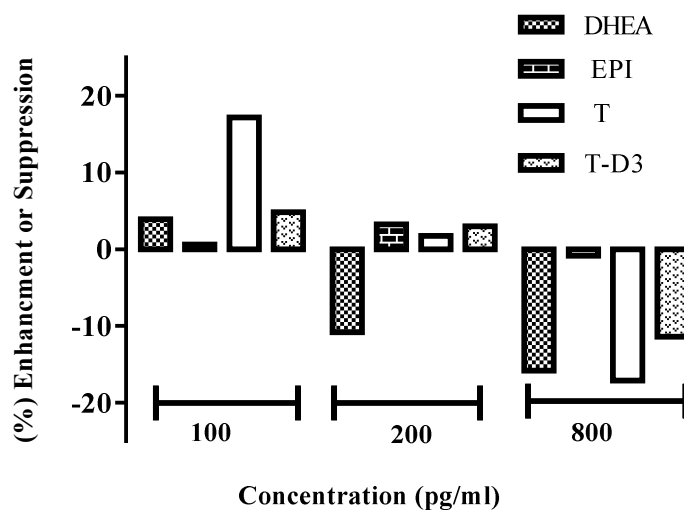

33

34

Figure S4. Mean matrix effect (n = 3).

35

36

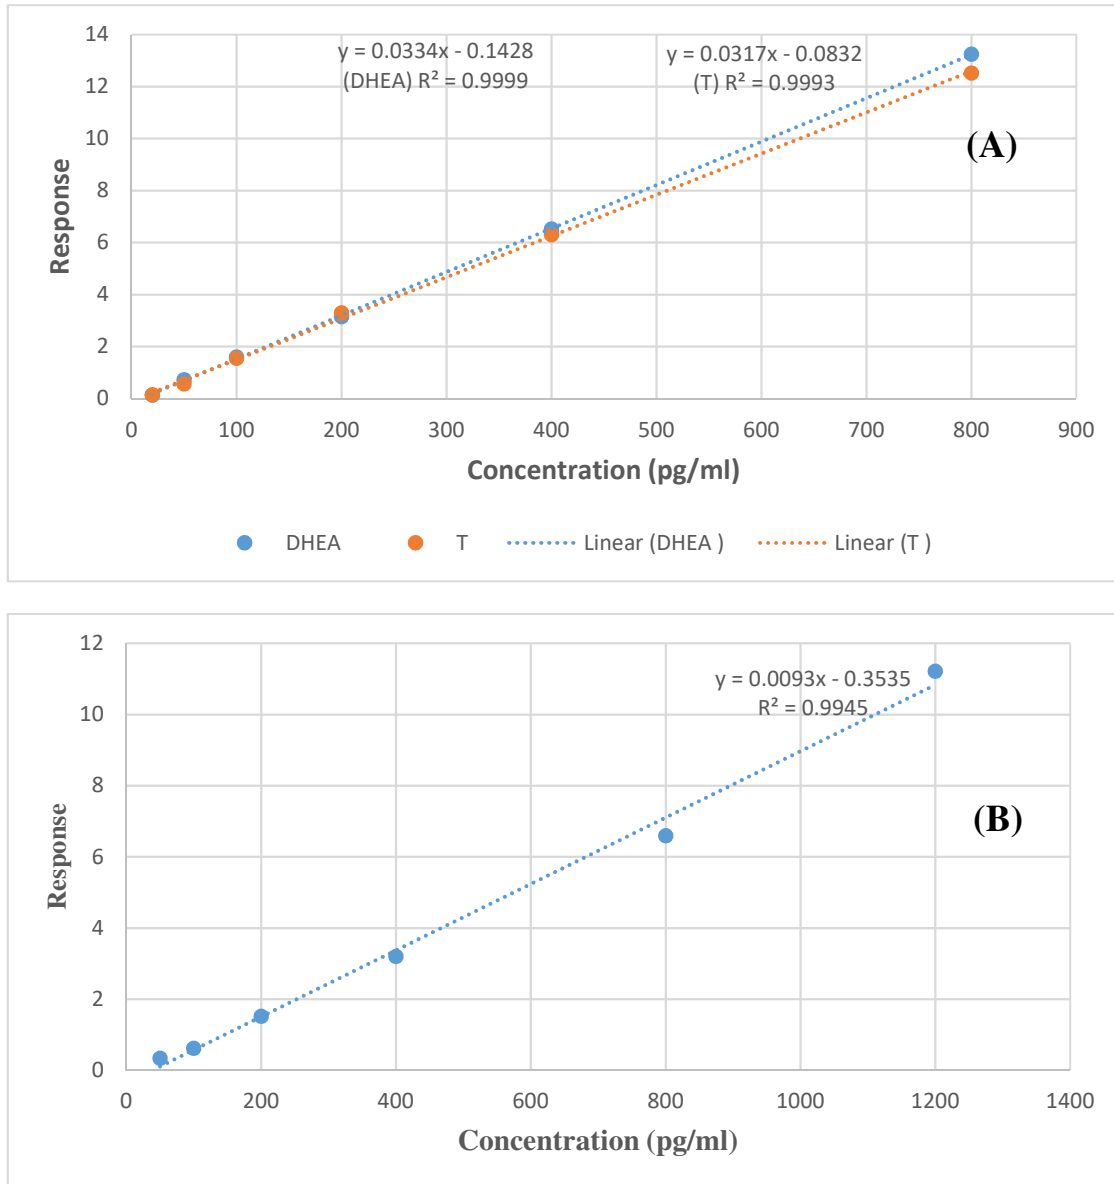

37  
 38  
 39  
 40

**Fig S5.** Calibration curve for (A): (T) testosterone (orange colour), (DHEA) Dehydroepiandrosterone (blue colour) in the range of 20-800 pg/ml each, and (B): (EPI) Epitestosterone in the range of 50-1200 pg/ml.

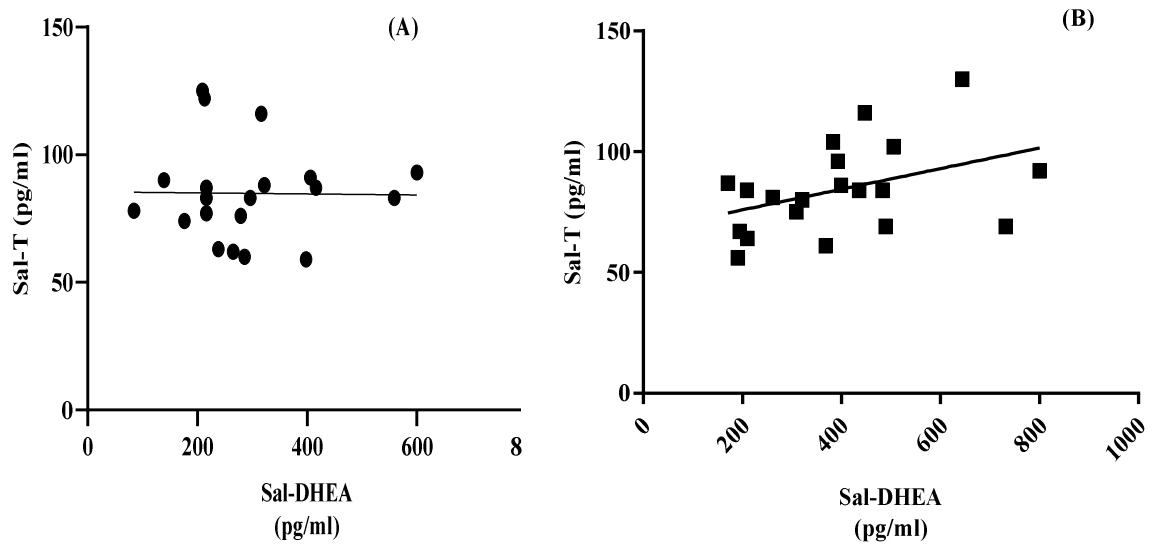

41 **Fig S6.** Correlation between the concentrations of Sal-DHEA and Sal-T (n=20) were (A) pre-training  
42 and (B) post-training.

43  
44  
45  
46  
47
